# Supplementary material for: Animal and Cellular Studies Demonstrate Some of the Beneficial Impacts of Herring Milt Hydrolysates on Obesity-Induced Glucose Intolerance and Inflammation
Source: PubMed Central journal article supplement (PMC7690616; doi:10.3390/nu12113235), 2020-10-22
Supplement: nutrients-12-03235-s001.pdf [file nutrients-12-03235-s001.pdf]

**Supplementary Figure 1.** Pathways significantly enriched from the list of 1994 differentially transcripts in HFHS diet vs Chow diet.

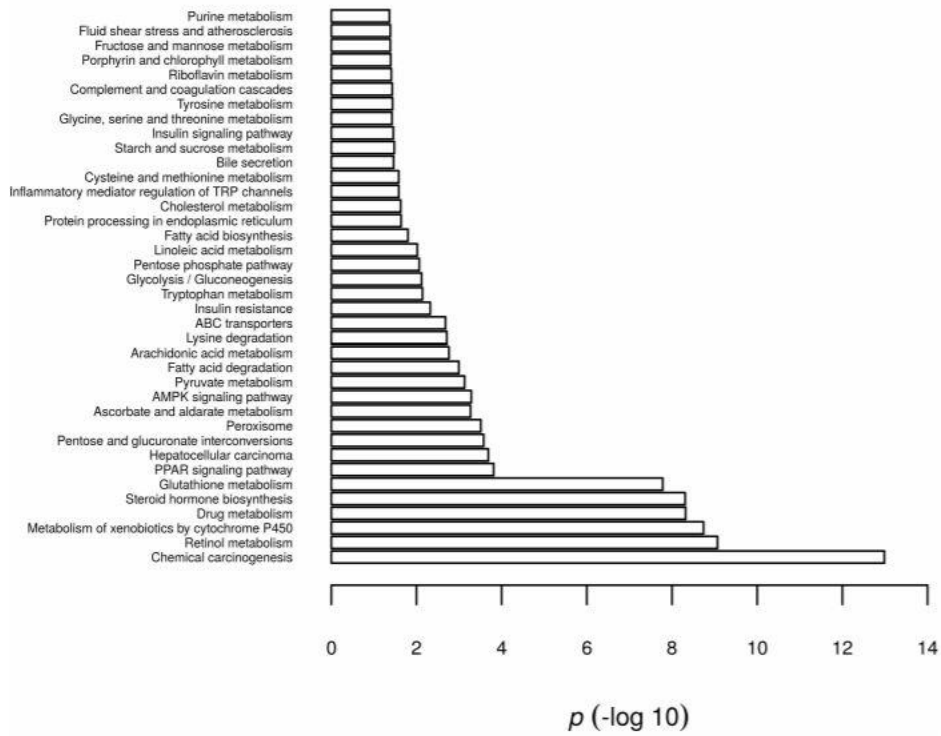

**Supplementary Figure 2.** Effect of HFHS diet on the Lactobacillus population in the gut microbiota of C57Bl/6J male mice after 8 weeks of treatment. ##  $p < 0.01$ .

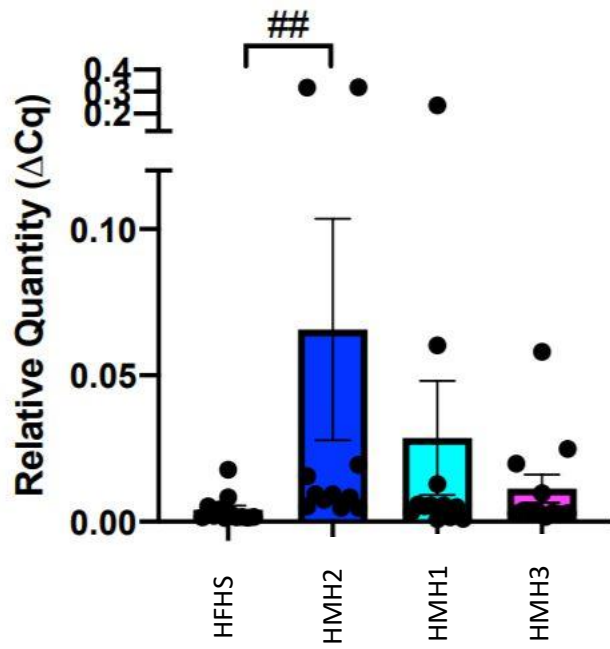

**Supplementary Table 1.** Transcripts showing differential expression a trend in HMH supplementations vs HFHS diet comparisons.

| RefSeq mRNA  | HMH1 logFC | HMH1 FDR p-value | HMH2 logFC | HMH2 FDR p-value | HMH3 logFC | HMH3 FDR p-value | Symbol        | Gene names                                          |
|--------------|------------|------------------|------------|------------------|------------|------------------|---------------|-----------------------------------------------------|
| NM_008484    | 7.325      | 0.0000127        | 7.11       | 0.0000338        | 0.03       | 1.000            | Lamb3         | laminin, beta 3                                     |
| NM_009344    | -0.283     | 1.000            | -0.99      | 0.00593          | -0.09      | 1.000            | Phlda1        | pleckstrin homology like domain, family A, member 1 |
| NM_008239    | -0.581     | 1.000            | -1.50      | 0.00593          | -0.31      | 1.000            | Foxq1         | forkhead box Q1                                     |
| NM_008390    | 0.030      | 1.000            | 0.75       | 0.00593          | 0.47       | 1.000            | Irf1          | interferon regulatory factor 1                      |
| NM_028778    | 0.172      | 1.000            | 0.37       | 0.00998          | 0.30       | 0.496            | Nuak2         | NUAK family, SNF1-like kinase, 2                    |
| NR_028360    | -0.292     | 1.000            | -0.56      | 0.0509           | -0.14      | 1.000            | 1700018L02Rik | RIKEN cDNA 1700018L02 gene                          |
| NR_045284    | -0.389     | 1.000            | -0.75      | 0.0509           | -0.22      | 1.000            | Gm16551       | predicted gene 16551                                |
| NM_001177352 | -0.667     | 1.000            | -1.55      | 0.0509           | -0.37      | 1.000            | Myc           | myelocytomatosis oncogene                           |
| NM_010849    | -0.667     | 1.000            | -1.55      | 0.0509           | -0.37      | 1.000            | Myc           | myelocytomatosis oncogene                           |
| NM_008599    | 0.031      | 1.000            | 1.58       | 0.0509           | 0.27       | 1.000            | Cxcl9         | chemokine (C-X-C motif) ligand 9                    |
| NR_028384    | -0.728     | 1.000            | -1.16      | 0.0629           | -0.37      | 1.000            | 4930528A17Rik | RIKEN cDNA 4930528A17 gene                          |
| NM_001195632 | 0.073      | 1.000            | 0.30       | 0.0629           | 0.12       | 1.000            | Arhgap32      | Rho GTPase activating protein 32                    |
| NM_001256184 | 0.250      | 1.000            | 0.62       | 0.0629           | 0.13       | 1.000            | Gm5108        | predicted gene 5108                                 |
| NM_008330    | 0.124      | 1.000            | 0.87       | 0.0629           | 0.37       | 1.000            | Ifi47         | interferon gamma inducible protein 47               |
| NM_021334    | 0.433      | 1.000            | 1.14       | 0.0629           | 0.38       | 1.000            | Itgax         | integrin alpha X                                    |
| NM_021274    | 0.038      | 1.000            | 1.26       | 0.0629           | 0.35       | 1.000            | Cxcl10        | chemokine (C-X-C motif) ligand 10                   |
| NM_194336    | 0.066      | 1.000            | 1.23       | 0.0917           | 0.47       | 1.000            | Gbp6          | guanylate binding protein 6                         |
| NM_001355757 | 0.121      | 1.000            | 0.58       | 0.0930           | 0.26       | 1.000            | Irgm1         | immunity-related GTPase family M member 1           |
| NM_001039160 | 0.159      | 1.000            | 1.19       | 0.0930           | 0.47       | 1.000            | Gvin1         | GTPase, very large interferon inducible 1           |
| NM_001291067 | -0.511     | 1.000            | -0.93      | 0.0985           | -0.49      | 1.000            | Foxa2         | forkhead box A2                                     |
| NM_008509    | 0.065      | 1.000            | 0.32       | 0.0998           | 0.07       | 1.000            | Lpl           | lipoprotein lipase                                  |
| NM_010260    | 0.090      | 1.000            | 1.44       | 0.0998           | 0.43       | 1.000            | Gbp2          | guanylate binding protein 2                         |

Abbreviations: logFC, log<sub>2</sub> fold change; FDR p-value, false discovery rate-corrected p-value; HFHS, High fat high sugar.
